# Supplementary material
Source: PubMed Central journal article supplement (PMC6821592)
Supplement: NIHMS1530558-supplement-Supplementary___Appendix__online_only_material__etc__.pdf [file NIHMS1530558-supplement-Supplementary___Appendix__online_only_material__etc__.pdf]

## Supplementary Information

### Supplementary tables

**Table S1. Exome sequencing capture statistics**

| Sample ID       | Total Reads | PostQC Reads | Mapped | Duplicates | On Target | Data in Gb          | bases at 1x | bases at 4x  | bases at 8x  | bases at 20x | Average Coverage |
|-----------------|-------------|--------------|--------|------------|-----------|---------------------|-------------|--------------|--------------|--------------|------------------|
| <b>Family A</b> |             |              |        |            |           |                     |             |              |              |              |                  |
| I-1             | 134702157   | 133756269    | 99.30% | 17.00%     | 75.66%    | 13.51               | 99.90%      | 99.81%       | 99.68%       | 98.90%       | 139.48           |
| I-2             | 147618262   | 146756580    | 99.42% | 13.00%     | 74.04%    | 14.82               | 99.72%      | 99.60%       | 99.48%       | 98.89%       | 149.31           |
| II-1            | 113057031   | 112720329    | 99.70% | 10.00%     | 73.95%    | 11.38               | 99.67%      | 99.53%       | 99.33%       | 98.21%       | 114.28           |
| II-2            | 124971214   | 124486763    | 99.61% | 13.00%     | 75.45%    | 12.57               | 99.70%      | 99.58%       | 99.43%       | 98.61%       | 129.38           |
| <b>Family B</b> |             |              |        |            |           |                     |             |              |              |              |                  |
| Sample ID       | Total Reads | PostQC Reads | Mapped | Duplicates | On Target | Data in Gb          | bases at 1x | bases at 4x  | bases at 8x  | bases at 20x | Average Coverage |
| II-1            | 105671388   | 104827500    | 99.20% | 11.00%     | 79.24%    | 10.59               | 99.82%      | 99.61%       | 99.24%       | 97.34%       | 136.4            |
| <b>Family C</b> |             |              |        |            |           |                     |             |              |              |              |                  |
| Sample ID       | Total Reads | PostQC Reads | Mapped | Duplicates | On Target | On Target +/- 100nt | bases at 1x | bases at 10x | bases at 20x | bases at 50x | Average Coverage |
| III-1           | 133200258   | 132889362    | 87.90% | 43.43%     | 79.36%    | 86.14%              | 98.22%      | 96.94%       | 95.69%       | 86.27%       | 87.69            |
| IV-1            | 103423684   | 103183336    | 87.79% | 43.53%     | 79.43%    | 86.09%              | 98.11%      | 96.61%       | 94.77%       | 74.30%       | 67.81            |

| IV-3             | 119460904          | 119149033     | 88.21%            | 39.79%           | 79.93%                     | 87.48%             | 98.18%              | 96.81%              | 95.43%              | 84.26%                  | 84.48 |
|------------------|--------------------|---------------|-------------------|------------------|----------------------------|--------------------|---------------------|---------------------|---------------------|-------------------------|-------|
| IV-4             | 119744314          | 119442406     | 87.73%            | 41.03%           | 79.02%                     | 86.53%             | 98.33%              | 97.09%              | 95.65%              | 81.62%                  | 81.44 |
| IV-7             | 108627526          | 108396013     | 88.95%            | 42.56%           | 80.42%                     | 87.20%             | 98.12%              | 96.64%              | 94.97%              | 79.10%                  | 73.80 |
| IV-11            | 136178810          | 135839398     | 87.83%            | 42.23%           | 79.28%                     | 86.60%             | 98.27%              | 97.10%              | 95.97%              | 87.96%                  | 91.41 |
| <b>Family D</b>  |                    |               |                   |                  |                            |                    |                     |                     |                     |                         |       |
| <b>Sample ID</b> | <b>Total Reads</b> | <b>Mapped</b> | <b>Duplicates</b> | <b>On Target</b> | <b>On Target +/- 100nt</b> | <b>bases at 1x</b> | <b>bases at 10x</b> | <b>bases at 20x</b> | <b>bases at 50x</b> | <b>Average Coverage</b> |       |
| I-1              | 90014486           | 99.58%        | 8.35%             | 69.90%           | 87.55%                     | 98.62%             | 96.51%              | 90.32%              | 56.98%              | 64.42                   |       |
| I-2              | 89540700           | 99.52%        | 5.85%             | 70.88%           | 87.76%                     | 98.47%             | 96.86%              | 92.10%              | 59.28%              | 66.00                   |       |
| II-1             | 92561584           | 99.60%        | 6.50%             | 70.17%           | 87.64%                     | 98.50%             | 97.04%              | 92.94%              | 60.97%              | 68.05                   |       |

**Table S2. Recessive protein-altering variants (minor allele frequency < 1%) identified in probands**

| Gene            | OMIM disease annotation                                                       | Genomic position                  | cDNA variant                        | Protein variant                         | Mode                  | Sanger* sequencing confirmation | CADD score** | HGMD entry | Frequency gnomAD (homozygotes)*** | Score according to ACMG criteria |
|-----------------|-------------------------------------------------------------------------------|-----------------------------------|-------------------------------------|-----------------------------------------|-----------------------|---------------------------------|--------------|------------|-----------------------------------|----------------------------------|
| <b>Family A</b> |                                                                               |                                   |                                     |                                         |                       |                                 |              |            |                                   |                                  |
| SLC44A5         | no                                                                            | chr1:75708628                     | NM_152697:<br>c.414C>G              | NP_689910:<br>p.Asp138Glu               | compound heterozygous | ND                              | 12           | not found  | 988/281344 (6)                    | benign                           |
| SLC44A5         | no                                                                            | chr1:75688101                     | NM_152697:<br>c.1030A>C             | NP_689910:<br>p.Ile344Leu               | compound heterozygous | ND                              | 23           | not found  | 2088/282226 (12)                  | benign                           |
| ZNF142          | no                                                                            | chr2:219513813_219513814          | NM_001105537:<br>c.817_818delAA     | NP_001099007:<br>p.Lys273Glufs*32       | compound heterozygous | yes                             | 33           | not found  | not found                         | Likely pathogenic                |
| ZNF142          | no                                                                            | chr2:219511053                    | NM_001105537:<br>c.1292delG         | NP_001099007:<br>p.Cys431Leufs*11       | compound heterozygous | yes                             | 35           | not found  | not found                         | Likely pathogenic                |
| <b>Family B</b> |                                                                               |                                   |                                     |                                         |                       |                                 |              |            |                                   |                                  |
| ZNF142          | no                                                                            | chr2:219508064                    | NM_001105537:<br>c.3175C>T          | NP_001099007:<br>p.Arg105 <sup>f</sup>  | homozygous            | yes                             | 37           | not found  | 2/249310 (0)                      | Likely pathogenic                |
| SLC19A3         | MIM: 607483 (thiamine metabolism dysfunction syndrome 2, autosomal-recessive) | chr2:228563479                    | NM_025243:<br>c.952G>A              | NP_079519:<br>p.Ala318Thr               | homozygous            | yes                             | 28           | not found  | not found                         | VUS                              |
| <b>Family C</b> |                                                                               |                                   |                                     |                                         |                       |                                 |              |            |                                   |                                  |
| ZNF142          | no                                                                            | chr2:219507056,<br>chr2:219507054 | NM_001105537:<br>c.4183delC+4185G>A | NP_001099007:<br>p.Leu1395 <sup>r</sup> | homozygous            | yes                             | 35           | not found  | not found                         | Likely pathogenic                |
| RUFY4           | no                                                                            | chr2:218938589                    | NM_198483.3:<br>c.581A>T            | NP_940885.2:<br>p.Asn194Ile             | homozygous            | ND                              | 4.5          | not found  | 320/280382 (03)                   | benign                           |
| <b>Family D</b> |                                                                               |                                   |                                     |                                         |                       |                                 |              |            |                                   |                                  |
| ZNF142          | no                                                                            | chr2:219507541                    | NM_001105537:<br>c.3698G>T          | NP_001099007:<br>p.Cys1233Phe           | compound heterozygous | yes                             | 31           | not found  | not found                         | VUS                              |
| ZNF142          | no                                                                            | chr2:219505483                    | NM_001105537:<br>c.4498C>T          | NP_001099007:<br>p.Arg1500Trp           | compound heterozygous | yes                             | 26           | not found  | not found                         | VUS                              |

\*ND, not done. \*\*CADD model: GRCh37-v1.4; PHRED scores are listed. \*\*\*ZNF142 variants were absent from our in-house dataset of 10,000 exomes, which includes >300 of Czech and Slovakian descent, and >500 individuals of Turkish origin.

**Table S3. Heterozygous protein-altering variants (minor allele frequency < 1%) identified in probands**

| Gene                                                                                                                           | OMIM disease annotation                                                        | Genomic position | cDNA variant         | Protein variant         | Mode                 | Sanger* sequencing confirmation | CADD score** | HGMD entry | Frequency gnomAD | Significance according to ACMG |
|--------------------------------------------------------------------------------------------------------------------------------|--------------------------------------------------------------------------------|------------------|----------------------|-------------------------|----------------------|---------------------------------|--------------|------------|------------------|--------------------------------|
| <b>HGMD-annotated variants (heterozygous) in neurologically relevant disease genes identified in proband B-II-1 (family B)</b> |                                                                                |                  |                      |                         |                      |                                 |              |            |                  |                                |
| <i>GMPPB</i>                                                                                                                   | MIM: 615350-52 (muscular dystrophy-dystroglycanopathy types 14 A-C, recessive) | chr3:49759776    | NM_013334: c.656T>C  | NP_037466: p.Ile219Thr  | heterozygous         | ND                              | 24           | CM146305   | 17/282458        | pathogenic                     |
| <i>MUT</i>                                                                                                                     | MIM: 251000 (methylmalonic aciduria mut(0) type, autosomal-recessive)          | chr6:49419420    | NM_000255: c.1091A>C | NP_000246: p.Tyr364Ser  | heterozygous         | ND                              | 26           | CM074361   | 11/281422        | pathogenic                     |
| <b>Heterozygous variants identified in proband II-2 (Family D)</b>                                                             |                                                                                |                  |                      |                         |                      |                                 |              |            |                  |                                |
| <i>MDGA2</i>                                                                                                                   | no                                                                             | chr14:47341163   | uc010ani.3 c.1226G>A | uc010ani.3: p.Gly409Asp | de novo heterozygous | ND                              | 9            | not found  | not found        | VUS                            |

\*ND, not done. \*\*CADD model: GRCh37-v1.4; PHRED scores are listed. VUS, variant of uncertain significance.

**Table S4. C<sub>2</sub>H<sub>2</sub>-type zinc finger proteins with clinical synopses.** The 720 genes in the C<sub>2</sub>H<sub>2</sub> family were cross-referenced with OMIM clinical synopses and classified as involved in neurodevelopmental processes (NDD) or other processes (OT). The NDDM designation was assigned to genes with a 'neurologic' and/or 'muscle, soft tissue' clinical synopsis, and also includes 'head and neck' clinical synopses only when they comprise macrocephaly or microcephaly.

| C <sub>2</sub> H <sub>2</sub> family gene names | Protein Accession | Neurodevelopmental involvement | OMIM clinical synopses                                                                           |
|-------------------------------------------------|-------------------|--------------------------------|--------------------------------------------------------------------------------------------------|
| CTCF                                            | P49711            | NDD                            | MENTAL RETARDATION, AUTOSOMAL DOMINANT 21; MRD21                                                 |
| EGR2                                            | P11161            | NDD                            | HYPERTROPHIC NEUROPATHY OF DEJERINE-SOTTAS                                                       |
| GFI1B                                           | Q5VTD9            | OT                             | BLEEDING DISORDER, PLATELET-TYPE, 17; BDPLT17                                                    |
| GLI1                                            |                   | OT                             | POLYDACTYLY, POSTAXIAL, TYPE A8; PAPA8                                                           |
| GLI2                                            |                   | NDD                            | CULLER-JONES SYNDROME; CJS                                                                       |
| GLI3                                            | P10071            | NDD                            | POLYDACTYLY, POSTAXIAL, TYPE A1; PAPA1                                                           |
| IKZF1                                           |                   | OT                             | IMMUNODEFICIENCY, COMMON VARIABLE, 13; CVID13                                                    |
| KLF1                                            | Q13351            | OT                             | ANEMIA, CONGENITAL DYSERYTHROPOIETIC, TYPE IV; CDAN4                                             |
| MECOM                                           | Q03112            | OT                             | RADIOULNAR SYNOSTOSIS WITH AMEGAKARYOCYTIC THROMBOCYTOPENIA 2; RUSAT2                            |
| PRDM5                                           | Q9NQX1            | NDD                            | BRITTLE CORNEA SYNDROME 2; BCS2                                                                  |
| PRDM6                                           | Q9NQX0            | OT                             | PATENT DUCTUS ARTERIOSUS 3; PDA3                                                                 |
| PRDM12                                          | Q9H4Q4            | NDD                            | NEUROPATHY, HEREDITARY SENSORY AND AUTONOMIC, TYPE VIII; HSN8                                    |
| PRDM16                                          |                   | OT                             | LEFT VENTRICULAR NONCOMPACTION 8; LVNC8                                                          |
| SNAI1                                           | O95863            | OT                             | WAARDENBURG SYNDROME, TYPE 2D; WS2D                                                              |
| SP7                                             | Q8TDD2            | NDD                            | OSTEOGENESIS IMPERFECTA, TYPE XII; OI12                                                          |
| TRPS1                                           | Q9UHF7            | NDD                            | TRICHORHINOPHALANGEAL SYNDROME, TYPE I; TRPS1                                                    |
| TSHZ1                                           | Q6ZSZ6            | OT                             | AURAL ATRESIA, CONGENITAL; CAA                                                                   |
| WT1                                             | P19544            | NDD                            | WILMS TUMOR 1; WT1                                                                               |
| YY1                                             |                   | NDD                            | GABRIELE-DE VRIES SYNDROME; GADEV5                                                               |
| ZEB2                                            |                   | NDD                            | MOWAT-WILSON SYNDROME; MOWS                                                                      |
| ZIC2                                            | O95409            | NDD                            | HOLOPROSENCEPHALY 5; HPE5                                                                        |
| HIVEP2                                          | P31629            | NDD                            | MENTAL RETARDATION, AUTOSOMAL DOMINANT 43; MRD43                                                 |
| ZNF41                                           | P51814            | NDD                            | MENTAL RETARDATION, X-LINKED 89; MRX89                                                           |
| BCL6                                            | P41182            | NDD                            | MICROPHthalmIA, SYNDROMIC 2; MCOPS2                                                              |
| ZNF57                                           | Q68EA5            | OT                             | DIABETES MELLITUS, TRANSIENT NEONATAL, 1                                                         |
| ZNF81                                           | P51508            | NDD                            | MENTAL RETARDATION, X-LINKED 45; MRX45                                                           |
| ZFPM2                                           | Q8WW38            | NDD                            | 46,XY SEX REVERSAL 9; SRXY9                                                                      |
| ZNF141                                          |                   | OT                             | POLYDACTYLY, POSTAXIAL, TYPE A6; PAPA6                                                           |
| ZBTB16                                          | Q05516            | NDD                            | SKELETAL DEFECTS, GENITAL HYPOPLASIA, AND MENTAL RETARDATION                                     |
| ZNF148                                          | Q9UQR1            | NDD                            | GLOBAL DEVELOPMENTAL DELAY, ABSENT OR HYPOPLASTIC CORPUS CALLOSUM, AND DYSMORPHIC FACIES; GDACCF |
| GFI1                                            | Q99684            | OT                             | NEUTROPENIA, NONIMMUNE CHRONIC IDIOPATHIC, OF ADULTS                                             |
| ZIC1                                            |                   | NDD                            | CRANIOSYNOSTOSIS 6; CRS6                                                                         |
| ZIC3                                            | O60481            | NDD                            | HETEROTAXY, VISCERAL, 1, X-LINKED; HTX1                                                          |
| EGR1                                            | P18146            | NDD                            | PONTOCEREBELLAR HYPOPLASIA, TYPE 7; PCH7                                                         |

| <b>C<sub>2</sub>H<sub>2</sub> family gene names</b> | <b>Protein Accession</b> | <b>Neurodevelopmental involvement</b> | <b>OMIM clinical synopses</b>                                              |
|-----------------------------------------------------|--------------------------|---------------------------------------|----------------------------------------------------------------------------|
| ZBTB18                                              | Q99592                   | NDD                                   | MENTAL RETARDATION, AUTOSOMAL DOMINANT 22; MRD22                           |
| ZBTB20                                              | Q9HC78                   | NDD                                   | PRIMROSE SYNDROME; PRIMS                                                   |
| SCAPER                                              | Q9BY12                   | NDD                                   | INTELLECTUAL DEVELOPMENTAL DISORDER AND RETINITIS PIGMENTOSA; IDDRP        |
| FEZF1                                               | A0PJY2                   | NDD                                   | HYPOGONADOTROPIC HYPOGONADISM 22 WITH OR WITHOUT ANOSMIA; HH22             |
| ZNF335                                              | Q9H4Z2                   | NDD                                   | MICROCEPHALY 10, PRIMARY, AUTOSOMAL RECESSIVE; MCPH10                      |
| GZF1                                                | Q9H116                   | OT                                    | JOINT LAXITY, SHORT STATURE, AND MYOPIA; JLSM                              |
| OVOL2                                               | Q9BRP0                   | OT                                    | CORNEAL DYSTROPHY, POSTERIOR POLYMORPHOUS, 1; PPCD1                        |
| ZNF341                                              | Q9BYN7                   | NDD                                   | HYPER-IgE RECURRENT INFECTION SYNDROME 3, AUTOSOMAL RECESSIVE; HIES3       |
| ZNF408                                              | Q9H9D4                   | OT                                    | EXUDATIVE VITREORETINOPATHY 6; EVR6                                        |
| ZFHX2                                               | Q9C0A1                   | NDD                                   | MARSILI SYNDROME; MARSIS                                                   |
| ZNF423                                              | Q2M1K9                   | ND                                    | NEPHRONOPHTHISIS 14; NPHP14                                                |
| ZBTB24                                              | O43167                   | NDD                                   | IMMUNODEFICIENCY-CENTROMERIC INSTABILITY-FACIAL ANOMALIES SYNDROME 2; ICF2 |
| ZNF469                                              |                          | NDD                                   | BRITTLE CORNEA SYNDROME 1; BCS1                                            |
| ZNF513                                              | Q8N8E2                   | OT                                    | RETINITIS PIGMENTOSA 58; RP58                                              |
| GLIS3                                               | Q8NEA6                   | NDD                                   | DIABETES MELLITUS, NEONATAL, WITH CONGENITAL HYPOTHYROIDISM; NDH           |
| ZNF711                                              | Q9Y462                   | NDD                                   | MENTAL RETARDATION, X-LINKED 97; MRX97                                     |
| SALL1                                               | Q9NSC2                   | NDD                                   | TOWNES-BROCKS SYNDROME 1; TBS1                                             |
| SALL2                                               | Q9Y467                   | OT                                    | COLOBOMA, OCULAR, AUTOSOMAL RECESSIVE                                      |
| SALL4                                               | Q9UJQ4                   | NDD                                   | IVIC SYNDROME                                                              |
| CHAMP1                                              | Q96JM3                   | NDD                                   | MENTAL RETARDATION, AUTOSOMAL DOMINANT 40; MRD40                           |
| BCL11A                                              |                          | NDD                                   | INTELLECTUAL DEVELOPMENTAL DISORDER WITH PERSISTENCE OF FETAL HEMOGLOBIN   |
| BCL11B                                              | Q9C0K0                   | NDD                                   | IMMUNODEFICIENCY 49; IMD49                                                 |
| PLAG1                                               | Q6DJT9                   | OT                                    | SALIVARY GLAND ADENOMA, PLEOMORPHIC                                        |
| ZBTB42                                              | B2RXF5                   | NDD                                   | LETHAL CONGENITAL CONTRACTURE SYNDROME 6; LCCS6                            |

### Zinc finger protein subgroups

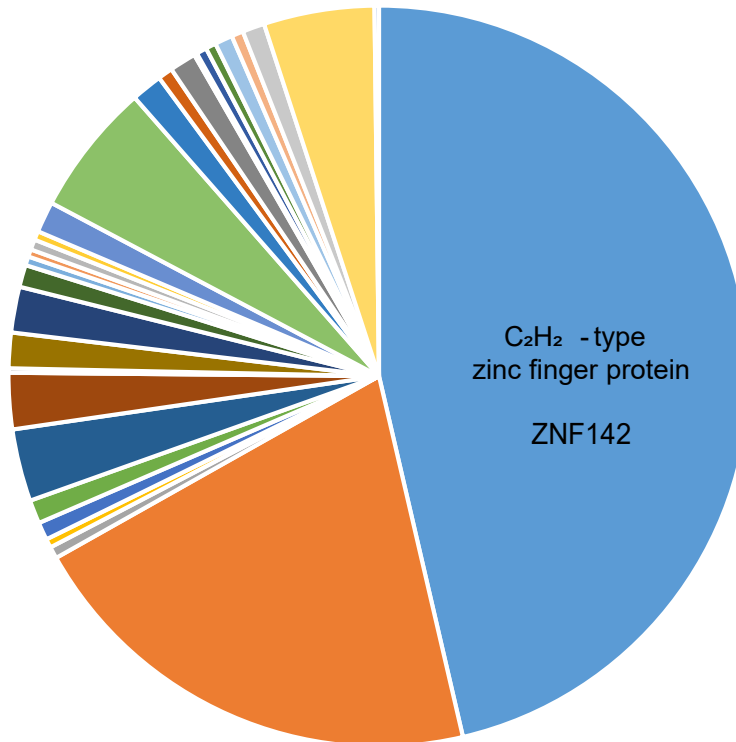

- Zinc fingers C<sub>2</sub>H<sub>2</sub>-type
- Zinc fingers BED-type
- Nuclear hormone receptors
- Zinc fingers DHHC-type
- Zinc fingers HIT-type
- Zinc fingers MYM-type
- Zinc fingers RANBP2-type
- Zinc fingers PARP-type
- Zinc fingers CXXC-type
- LIM domain containing
- Ring finger proteins
- THAP domain containing
- CCCH-type
- Zinc fingers FYVE-type
- Zinc fingers matrin-type
- Zinc fingers MYND-type
- Zinc fingers SWIM-type
- Zinc fingers CW-type
- Zinc fingers 3CxxC-type
- Zinc fingers C<sub>2</sub>H<sub>2</sub>C-type
- Zinc fingers AN1-type
- Zinc fingers C<sub>2</sub>HC-type
- Zinc fingers DBF-type
- GATA zinc finger domain containing
- Zinc fingers MIZ-type
- PHD finger proteins
- Zinc fingers ZZ-type
- Zinc fingers GRF-type
- ZF class homeoboxes and pseudogenes

**Figure S1**

**Fig. S1: Zinc finger protein (ZNF/zfps) subgroups in human.** ZNF/zfps represent a large class of proteins with 1593 genes described in the HUGO Gene Nomenclature committee (HGNC) database (<https://www.genenames.org/>). The ZNF/zfp family subdivides into 29 subgroups based on folded protein structures. ZNF142 belongs to the largest subgroup, whose 720 members have a C<sub>2</sub>H<sub>2</sub> domain. Pie chart shows the size comparison of the various ZNF/zfp subfamilies represented in the HGNC database, with ZNF142 denoted within the C<sub>2</sub>H<sub>2</sub> subfamily.



# Family C

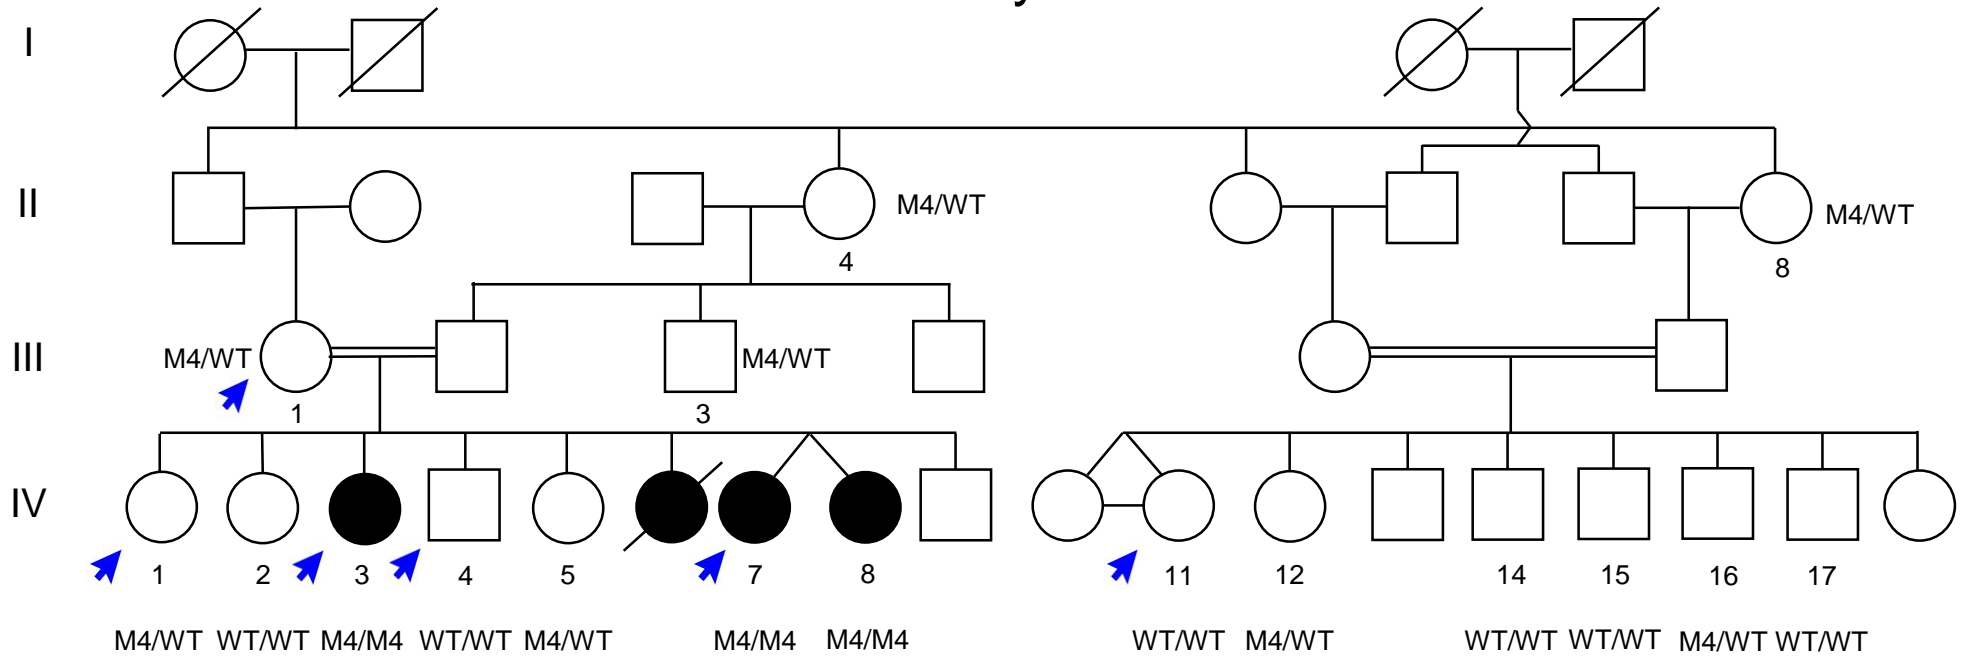

Figure S2

**Fig. S2: Extended pedigree of Family C indicating a recessive pattern of inheritance.** Family C has two consanguineous loops represented by double horizontal lines. The unaffected individuals are indicated by unfilled circles (females) and squares (males) whereas the affected individuals are represented by black filled circles. The blue arrows indicate individuals subjected to ES. Genotypes are labeled under each individual (WT/WT for wild type, M4/WT for heterozygous and M4/M4 for homozygous). M4; c. 4183delC+4185G>A; p. Leu1395\*.

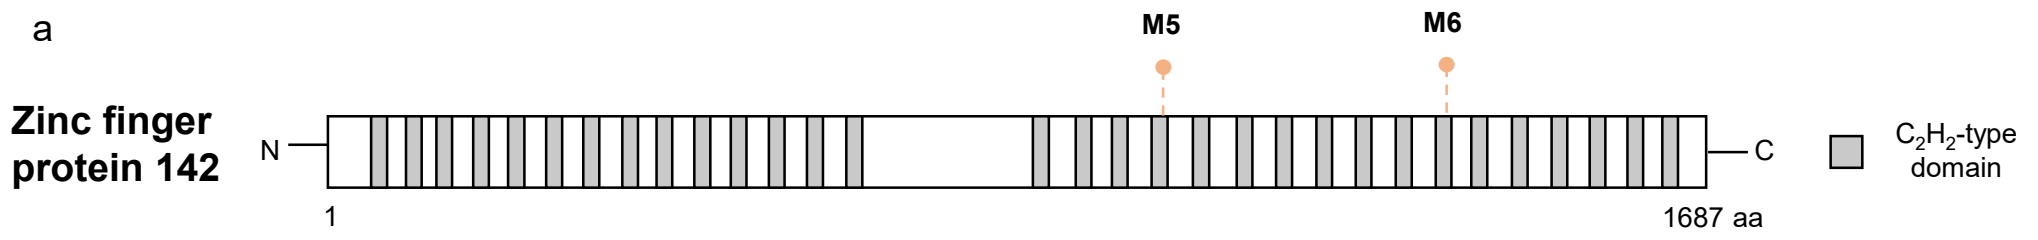

**b**

**M5: p.C1233F** **M6: p.R1500W**

|            |       |                      |       |                          |
|------------|-------|----------------------|-------|--------------------------|
| Human      | ----- | HTGIGRIPCSSCPQTFGT   | ----- | CADPSRLKYHMR IHKEERKYLCP |
| Chimpanzee | ----- | HTGIGRIPCSSCPQTFGT   | ----- | CADPSRLKYHMR IHKEERKYLCP |
| Macaque    | ----- | HTGIGRIPCSSCPQTFGT   | ----- | CADPSRLKYHMR IHKEERKYLCP |
| Dog        | ----- | HTGVGRIPCSSCPQTFGT   | ----- | CADPSRLKYHMR IHKEERKYLCP |
| Rat        | ----- | HTGVGRIPCSSCPQTFGT   | ----- | CADPSRLKYHMR IHKEERKYLCP |
| Mouse      | ----- | HTGVGRIPCSSCPQTFGT   | ----- | CADPSRLKYHMR IHKEERKYLCP |
| Chicken    | ----- | HTGVGR IACG ICSQTFGT | ----- | CADPSRLKYHMR IHKEERKYLCP |
| Zebrafish  | ----- | HTGVGRHSCELCGQTFGT   | ----- | CADPSRLKYHMR IHMDERKYLCP |
|            |       | *** : ** * *         |       | ***** : *****            |

Figure S3

**Fig. S3: Missense *ZNF142* variants in family D are highly conserved.**

(a) Schematic representation of ZNF142 protein; gray colored rectangles represent predicted C<sub>2</sub>H<sub>2</sub>-type domains. Missense variants are indicated with salmon-colored lollipops.

(b) Multiple sequence alignment of regions surrounding the two missense variants in ZNF142 generated with Clustal Omega. Amino acid color scheme: Red- hydrophobic or aromatic (AVFPMILWY); blue- acidic (DE); magenta- basic (RHK); green- hydroxyl, amine, basic and glutamine (STYHCNGQ). Consensus symbols, an asterisk (\*) indicates positions which have a single, fully conserved residue; a colon (:) indicates conservation between groups of strongly similar properties scoring > 0.5 in the Gonnet PAM 250 matrix.

## Supplementary Methods

### *ES and variant annotation*

Families A and B. We performed quartet-based ES (Family A, Fig. 1a); or ES of the simplex case (Family B, Fig. 1b). We constructed exome-enriched indexed libraries with the SureSelect All Exon system (Agilent Technologies) per manufacturer's recommendations. Paired-end (101 base pair [bp]) sequencing was carried out on either a HiSeq4000 (family A) or HiSeq2500 (family B) platform (Illumina). We processed raw data with an in-house bioinformatics pipeline with established methods<sup>1,2</sup>. In brief, read-mapping to the reference genome (hg19) was done with the Burrows-Wheeler Aligner (BWA) tool<sup>3</sup> or GATK. Single-nucleotide variants and small insertions and deletions were called with SAMtools and PINDEL and we mandated that variants satisfied the criteria of a Phred-scaled genotype quality  $\geq 30$  and a read depth  $\geq 10$ . ExomeDepth was used to query exomes for copy-number variants. Aligned sequencing reads were inspected with the Integrative Genomics Viewer (IGV, Broad Institute).

Family C. We performed ES on DNA obtained from peripheral blood of two affected females (C-IV-3 and C-IV-7), their healthy mother (C-III-1), two healthy siblings (C-IV-1, C-IV-4), and a healthy cousin (C-IV-11; Fig. 1c; Fig. S2). We performed library capture with the Nimblegen Exome capture kit and generated 150 bp paired-end reads on an Illumina HiSeq 4000 instrument as described.<sup>4</sup> Sequencing reads were processed initially with the TrimGalore toolkit, to remove any Illumina adapter sequences or low-quality base calls from the 3' end of the reads. Reads were then aligned to the human genome (hg19) with BWA<sup>3</sup>. Alignment processing and variant calls were performed using GATK<sup>5,6</sup>, following the Broad Institute's Best Practices workflow<sup>7</sup>. Variants were then annotated with the Variant Effect Predictor<sup>8</sup> toolkit to identify the potential functional impact of each variant according to the human transcriptome (GRCh37r75)<sup>8</sup>. We confirmed filtered variants visually using IGV.

Family D. Exome sequencing was performed on three individuals from Family D (D-I-1, D-I-2, D-II-2; Fig. 1d). Genomic DNA was sonicated to approximately 200 bp fragments and adaptor-ligated to make a library for paired-end sequencing. Following amplification and barcoding, the libraries were hybridized to biotinylated complementary RNA oligonucleotide baits from the SureSelect XT Human All Exon +UTR v5 75Mb Kit (Agilent Technologies, Santa Clara, CA) and purified using streptavidin-bound magnetic beads. Amplification was performed prior to sequencing on the Illumina HiSeq 2000 system (San Diego, CA). Exome reads were aligned with Novoalign (v3.02.00) and genome reads with bwa mem (v0.7.15) to the human reference genome assembly (hg19 dbSNP132-masked, UCSC Genome Browser). PCR duplicates were removed using Mark Duplicates from Picard (<http://picard.sourceforge.net>). SamTools and PicardTools were used to further process the SAM/BAM files. Variant calling was performed with GATK Unified Genotyper and variant annotation using ANNOVAR.

#### *Variant filtering*

We filtered data to retain functional variants exclusive to affected individuals (predicted to alter mRNA splicing or amino acid sequence) with a minor allele frequency (MAF) of  $\leq 1\%$  in public SNP databases (dbSNP142, 1000 Genomes, Exome Aggregation Consortium [ExAC], Genome aggregation database [gnomAD]) that segregated with disease in the pedigree. We also considered phenotype assessment, pathogenic variant database searches (ClinVar, Human Gene Mutation Database [HGMD], and the Database of genomic variation and Phenotype in Humans using Ensembl Resources [DECIPHER]), and American College of Medical Genetics categorization<sup>9</sup> as described<sup>1</sup>. We used SAMtools varFilter, custom scripts and our in-house database of controls (Munich, n=10,000 exomes; families A and B); Enlis Genome Research software (Enlis Genomics; family C); and SamTools and PicardTools (family D).

## References

1. Zech M, Boesch S, Jochim A, et al. Clinical exome sequencing in early-onset generalized dystonia and large-scale resequencing follow-up. *Mov Disord*. 2017;32(4):549-559.
2. Zech M, Boesch S, Maier EM, et al. Haploinsufficiency of KMT2B, Encoding the Lysine-Specific Histone Methyltransferase 2B, Results in Early-Onset Generalized Dystonia. *Am J Hum Genet*. 2016;99(6):1377-1387.
3. Li H, Durbin R. Fast and accurate short read alignment with Burrows-Wheeler transform. *Bioinformatics*. 2009;25(14):1754-1760.
4. Villanueva A, Willer JR, Bryois J, Dermitzakis ET, Katsanis N, Davis EE. Whole exome sequencing of a dominant retinitis pigmentosa family identifies a novel deletion in PRPF31. *Invest Ophthalmol Vis Sci*. 2014;55(4):2121-2129.
5. McKenna A, Hanna M, Banks E, et al. The Genome Analysis Toolkit: a MapReduce framework for analyzing next-generation DNA sequencing data. *Genome Res*. 2010;20(9):1297-1303.
6. DePristo MA, Banks E, Poplin R, et al. A framework for variation discovery and genotyping using next-generation DNA sequencing data. *Nat Genet*. 2011;43(5):491-498.
7. Van der Auwera GA, Carneiro MO, Hartl C, et al. From FastQ data to high confidence variant calls: the Genome Analysis Toolkit best practices pipeline. *Curr Protoc Bioinformatics*. 2013;43:11 10 11-33.
8. Cunningham F, Amode MR, Barrell D, et al. Ensembl 2015. *Nucleic Acids Res*. 2015;43(Database issue):D662-669.
9. Richards S, Aziz N, Bale S, et al. Standards and guidelines for the interpretation of sequence variants: a joint consensus recommendation of the American College of Medical Genetics and Genomics and the Association for Molecular Pathology. *Genet Med*. 2015;17(5):405-424.
